# Supplementary material
Source: PubMed Central journal article supplement (PMC6965968)
Supplement: ijcep0010-9675-f3.pdf [file ijcep0010-9675-f3.pdf]

*Mycobacterium tuberculosis* in Xuzhou

**Table S1.** Genotyping with spoligotyping and 15-loci MIRU-VNTR

| Strains | 15-loci VNTR |      |      |      |      |        |        |        |        |        |        |        |        |        |        | Spoligotypes |
|---------|--------------|------|------|------|------|--------|--------|--------|--------|--------|--------|--------|--------|--------|--------|--------------|
|         | ETRA         | ETRB | ETRC | ETRD | ETRE | MIRU10 | MIRU16 | MIRU23 | MIRU26 | MIRU27 | MIRU39 | MIRU40 | Mtub21 | Mtub30 | Mtub39 |              |
| MTB060  | 9            | 2    | 4    | 3    | 5    | 3      | 3      | 6      | 7      | 2      | 3      | 3      | 3      | 2      | 2      | Beijing      |
| MTB142  | 9            | 2    | 4    | 3    | 5    | 4      | 2      | 5      | 7      | 3      | 3      | 3      | 5      | 4      | 4      | Beijing      |
| MTB012  | 2            | 2    | 4    | 4    | 6    | 2      | 1      | 5      | 3      | 3      | 2      | 4      | 3      | 2      | 2      | Beijing      |
| MTB050  | 4            | 2    | 4    | 7    | 5    | 3      | 2      | 5      | 5      | 3      | 2      | 3      | 4      | 2      | 4      | Beijing      |
| MTB119  | 2            | 1    | 4    | 5    | 5    | 2      | 2      | 5      | 7      | 3      | 3      | 3      | 3      | 2      | 4      | Beijing      |
| MTB252  | 3            | 1    | 4    | 7    | 5    | 3      | 3      | 5      | 9      | 3      | 3      | 3      | 3      | 2      | 4      | Beijing      |
| MTB004  | 3            | 1    | 4    | 3    | 6    | 3      | 5      | 5      | 7      | 2      | 2      | 3      | 2      | 2      | 4      | Beijing      |
| MTB042  | 3            | 2    | 4    | 4    | 6    | 3      | 4      | 5      | 7      | 3      | 2      | 3      | 3      | 2      | 4      | Beijing      |
| MTB113  | 2            | 2    | 4    | 2    | 4    | 2      | 4      | 6      | 8      | 3      | 2      | 3      | 3      | 2      | 4      | Beijing      |
| MTB115  | 2            | 2    | 4    | 3    | 5    | 3      | 4      | 6      | 8      | 3      | 2      | 3      | 3      | 2      | 4      | Beijing      |
| MTB005  | 4            | 2    | 7    | 4    | 6    | 3      | 5      | 5      | 8      | 4      | 1      | 4      | 1      | 2      | 4      | Beijing      |
| MTB207  | 4            | 2    | 4    | 3    | 6    | 3      | 5      | 5      | 7      | 3      | 2      | 3      | 1      | 2      | 2      | Beijing      |
| MTB062  | 4            | 2    | 4    | 3    | 5    | 3      | 2      | 5      | 7      | 3      | 3      | 4      | 3      | 2      | 2      | Beijing      |
| MTB204  | 4            | 2    | 4    | 3    | 6    | 3      | 2      | 5      | 5      | 3      | 2      | 3      | 3      | 2      | 2      | Beijing      |
| MTB168  | 4            | 2    | 4    | 3    | 5    | 3      | 2      | 5      | 6      | 3      | 2      | 3      | 1      | 2      | 2      | Beijing      |
| MTB069  | 4            | 1    | 3    | 4    | 5    | 2      | 2      | 5      | 6      | 2      | 3      | 3      | 2      | 2      | 5      | Beijing      |
| MTB049  | 3            | 2    | 4    | 4    | 5    | 3      | 2      | 5      | 5      | 3      | 3      | 3      | 4      | 2      | 5      | Beijing      |
| MTB253  | 4            | 2    | 4    | 3    | 5    | 3      | 2      | 5      | 5      | 3      | 3      | 3      | 4      | 2      | 4      | Beijing      |
| MTB101  | 4            | 2    | 4    | 3    | 5    | 3      | 2      | 5      | 7      | 3      | 3      | 3      | 4      | 2      | 4      | Beijing      |
| MTB211  | 3            | 2    | 4    | 4    | 6    | 3      | 2      | 5      | 7      | 3      | 3      | 3      | 4      | 2      | 4      | Beijing      |
| MTB175  | 4            | 2    | 4    | 3    | 5    | 3      | 2      | 5      | 6      | 2      | 2      | 3      | 3      | 2      | 4      | Beijing      |
| MTB176  | 4            | 2    | 4    | 3    | 5    | 4      | 2      | 5      | 7      | 2      | 3      | 3      | 3      | 2      | 4      | Beijing      |
| MTB171  | 2            | 2    | 4    | 2    | 4    | 2      | 2      | 5      | 4      | 2      | 2      | 3      | 2      | 2      | 4      | Beijing      |
| MTB169  | 3            | 2    | 4    | 3    | 5    | 5      | 2      | 5      | 7      | 3      | 3      | 3      | 1      | 2      | 4      | Beijing      |
| MTB100  | 4            | 2    | 4    | 2    | 6    | 3      | 3      | 5      | 6      | 3      | 2      | 3      | 1      | 2      | 5      | Beijing      |
| MTB170  | 3            | 2    | 4    | 3    | 5    | 3      | 3      | 6      | 7      | 3      | 2      | 3      | 1      | 2      | 4      | Beijing      |
| MTB284  | 4            | 2    | 4    | 3    | 5    | 3      | 3      | 5      | 6      | 3      | 2      | 3      | 1      | 2      | 4      | Beijing      |
| MTB208  | 4            | 3    | 4    | 3    | 5    | 3      | 3      | 5      | 6      | 2      | 2      | 3      | 2      | 2      | 4      | Beijing      |
| MTB261  | 4            | 2    | 4    | 2    | 6    | 3      | 2      | 5      | 7      | 3      | 1      | 3      | 1      | 2      | 4      | Beijing      |
| MTB112  | 4            | 1    | 3    | 2    | 5    | 3      | 2      | 5      | 8      | 2      | 3      | 3      | 3      | 2      | 4      | Beijing      |
| MTB203  | 4            | 2    | 3    | 2    | 5    | 3      | 2      | 5      | 8      | 2      | 2      | 3      | 3      | 2      | 2      | Beijing      |
| MTB163  | 4            | 2    | 4    | 2    | 3    | 2      | 2      | 5      | 7      | 3      | 2      | 3      | 3      | 2      | 2      | Beijing      |
| MTB209  | 3            | 2    | 2    | 1    | 3    | 1      | 2      | 5      | 7      | 2      | 2      | 3      | 3      | 2      | 2      | Beijing      |
| MTB114  | 4            | 2    | 4    | 2    | 4    | 2      | 1      | 5      | 7      | 3      | 2      | 3      | 3      | 2      | 5      | NEW          |

*Mycobacterium tuberculosis* in Xuzhou

|        |   |   |   |   |   |   |   |   |   |   |   |   |   |   |   |              |
|--------|---|---|---|---|---|---|---|---|---|---|---|---|---|---|---|--------------|
| MTB173 | 4 | 2 | 4 | 3 | 5 | 2 | 1 | 5 | 7 | 2 | 2 | 3 | 2 | 2 | 4 | Beijing      |
| MTB174 | 4 | 1 | 4 | 2 | 4 | 2 | 1 | 5 | 7 | 2 | 2 | 3 | 2 | 2 | 4 | Beijing      |
| MTB162 | 3 | 2 | 4 | 2 | 4 | 2 | 1 | 5 | 7 | 3 | 1 | 3 | 1 | 2 | 4 | Beijing      |
| MTB064 | 2 | 2 | 3 | 2 | 4 | 2 | 2 | 5 | 8 | 3 | 2 | 3 | 3 | 2 | 4 | Beijing      |
| MTB164 | 2 | 2 | 2 | 1 | 3 | 2 | 2 | 5 | 8 | 3 | 2 | 3 | 3 | 2 | 4 | Beijing      |
| MTB111 | 2 | 2 | 4 | 2 | 4 | 1 | 2 | 5 | 7 | 2 | 2 | 3 | 3 | 2 | 4 | Beijing      |
| MTB152 | 3 | 2 | 4 | 2 | 4 | 1 | 2 | 5 | 7 | 2 | 2 | 3 | 3 | 2 | 4 | Beijing-like |
| MTB177 | 2 | 1 | 3 | 2 | 4 | 1 | 2 | 5 | 7 | 2 | 2 | 3 | 3 | 2 | 4 | Beijing      |
| MTB285 | 3 | 1 | 4 | 3 | 5 | 1 | 2 | 5 | 8 | 3 | 2 | 3 | 3 | 2 | 4 | Beijing      |
| MTB251 | 4 | 2 | 4 | 2 | 4 | 2 | 2 | 5 | 8 | 2 | 2 | 3 | 3 | 2 | 4 | Beijing      |
| MTB286 | 4 | 2 | 4 | 2 | 4 | 1 | 2 | 5 | 8 | 3 | 2 | 3 | 3 | 2 | 4 | Beijing      |
| MTB172 | 2 | 1 | 4 | 1 | 3 | 1 | 2 | 5 | 7 | 2 | 3 | 3 | 2 | 2 | 2 | Beijing      |
| MTB260 | 2 | 1 | 4 | 2 | 4 | 2 | 4 | 7 | 8 | 4 | 4 | 3 | 1 | 2 | 4 | Beijing      |
| MTB262 | 3 | 3 | 7 | 2 | 4 | 2 | 2 | 5 | 6 | 2 | 1 | 3 | 1 | 2 | 4 | Beijing      |
| MTB043 | 4 | 1 | 4 | 3 | 3 | 2 | 2 | 5 | 3 | 3 | 3 | 3 | 3 | 2 | 4 | Beijing      |
| MTB061 | 4 | 2 | 4 | 2 | 3 | 2 | 2 | 5 | 1 | 3 | 2 | 3 | 3 | 2 | 4 | Beijing      |
| MTB118 | 3 | 2 | 4 | 2 | 3 | 2 | 2 | 4 | 2 | 3 | 2 | 3 | 3 | 2 | 4 | Beijing      |
| MTB044 | 3 | 2 | 4 | 3 | 5 | 3 | 2 | 5 | 3 | 3 | 4 | 4 | 3 | 2 | 5 | Beijing      |
| MTB045 | 3 | 2 | 4 | 3 | 5 | 3 | 2 | 5 | 3 | 3 | 3 | 3 | 3 | 2 | 4 | Beijing      |
| MTB046 | 4 | 2 | 4 | 4 | 6 | 3 | 2 | 5 | 3 | 3 | 4 | 3 | 4 | 2 | 4 | Beijing      |
| MTB048 | 4 | 2 | 4 | 2 | 6 | 2 | 2 | 5 | 4 | 3 | 3 | 4 | 4 | 2 | 4 | Beijing      |
| MTB120 | 4 | 2 | 4 | 2 | 4 | 2 | 2 | 5 | 5 | 3 | 3 | 3 | 4 | 2 | 4 | Beijing      |
| MTB121 | 4 | 2 | 4 | 2 | 4 | 2 | 2 | 5 | 5 | 3 | 3 | 4 | 4 | 2 | 5 | Beijing      |
| MTB047 | 4 | 2 | 4 | 3 | 5 | 2 | 2 | 5 | 4 | 3 | 3 | 3 | 4 | 2 | 5 | Beijing      |
| MTB201 | 4 | 2 | 4 | 2 | 4 | 2 | 2 | 5 | 4 | 3 | 3 | 3 | 4 | 2 | 6 | Beijing      |
| MTB200 | 4 | 2 | 4 | 2 | 4 | 4 | 2 | 5 | 4 | 3 | 3 | 3 | 4 | 2 | 6 | Beijing      |
| MTB117 | 4 | 2 | 4 | 3 | 5 | 2 | 2 | 4 | 2 | 3 | 2 | 3 | 3 | 2 | 2 | Beijing      |
| MTB063 | 4 | 2 | 4 | 3 | 6 | 3 | 2 | 5 | 3 | 3 | 3 | 3 | 4 | 2 | 2 | Beijing      |
| MTB212 | 4 | 2 | 4 | 3 | 6 | 2 | 2 | 5 | 4 | 3 | 3 | 3 | 4 | 2 | 2 | MANU2        |
| MTB213 | 4 | 2 | 4 | 3 | 5 | 2 | 2 | 5 | 4 | 3 | 4 | 3 | 4 | 2 | 2 | Beijing      |
| MTB158 | 4 | 2 | 4 | 3 | 5 | 3 | 2 | 5 | 5 | 5 | 4 | 4 | 6 | 4 | 2 | Beijing      |
| MTB074 | 4 | 1 | 3 | 3 | 5 | 3 | 4 | 5 | 3 | 3 | 4 | 3 | 5 | 5 | 4 | Beijing      |
| MTB082 | 4 | 2 | 4 | 3 | 5 | 3 | 3 | 6 | 3 | 3 | 3 | 3 | 5 | 4 | 4 | U            |
| MTB146 | 4 | 2 | 4 | 3 | 5 | 4 | 2 | 5 | 3 | 3 | 3 | 3 | 5 | 4 | 4 | Beijing      |
| MTB248 | 4 | 2 | 4 | 3 | 5 | 4 | 3 | 5 | 3 | 3 | 3 | 3 | 4 | 5 | 4 | Beijing      |
| MTB287 | 6 | 2 | 4 | 5 | 6 | 3 | 2 | 5 | 5 | 3 | 3 | 3 | 4 | 5 | 4 | Beijing      |
| MTB091 | 3 | 1 | 4 | 2 | 2 | 2 | 1 | 5 | 7 | 3 | 3 | 2 | 5 | 4 | 5 | Beijing      |

*Mycobacterium tuberculosis* in Xuzhou

|        |   |   |   |   |   |   |   |   |   |   |   |   |   |   |   |         |
|--------|---|---|---|---|---|---|---|---|---|---|---|---|---|---|---|---------|
| MTB130 | 3 | 2 | 4 | 3 | 2 | 2 | 1 | 5 | 8 | 3 | 2 | 3 | 5 | 5 | 4 | Beijing |
| MTB154 | 6 | 2 | 4 | 5 | 5 | 3 | 2 | 5 | 8 | 4 | 4 | 2 | 6 | 4 | 2 | Beijing |
| MTB030 | 4 | 2 | 4 | 2 | 4 | 5 | 4 | 5 | 8 | 4 | 4 | 2 | 6 | 4 | 4 | Beijing |
| MTB001 | 4 | 1 | 4 | 2 | 6 | 4 | 3 | 5 | 7 | 3 | 2 | 3 | 4 | 5 | 2 | Beijing |
| MTB057 | 4 | 2 | 4 | 3 | 6 | 5 | 4 | 6 | 7 | 3 | 2 | 2 | 5 | 4 | 2 | Beijing |
| MTB070 | 3 | 2 | 4 | 1 | 6 | 6 | 4 | 5 | 7 | 3 | 3 | 3 | 4 | 5 | 4 | Beijing |
| MTB007 | 2 | 2 | 4 | 3 | 6 | 3 | 3 | 5 | 7 | 3 | 4 | 3 | 4 | 5 | 3 | Beijing |
| MTB006 | 2 | 2 | 4 | 2 | 4 | 4 | 3 | 5 | 6 | 3 | 3 | 3 | 4 | 5 | 2 | Beijing |
| MTB184 | 2 | 2 | 4 | 3 | 5 | 4 | 2 | 5 | 7 | 3 | 3 | 3 | 5 | 4 | 2 | Beijing |
| MTB052 | 4 | 2 | 4 | 3 | 5 | 6 | 2 | 5 | 5 | 3 | 3 | 3 | 4 | 5 | 3 | Beijing |
| MTB266 | 3 | 2 | 4 | 3 | 5 | 6 | 2 | 5 | 7 | 3 | 3 | 3 | 5 | 4 | 4 | Beijing |
| MTB277 | 3 | 2 | 4 | 4 | 8 | 6 | 2 | 5 | 8 | 4 | 3 | 2 | 6 | 4 | 4 | Beijing |
| MTB095 | 4 | 2 | 7 | 3 | 5 | 2 | 2 | 5 | 7 | 3 | 4 | 4 | 5 | 4 | 4 | Beijing |
| MTB132 | 6 | 2 | 6 | 2 | 4 | 2 | 2 | 5 | 8 | 3 | 3 | 3 | 5 | 5 | 4 | Beijing |
| MTB008 | 4 | 2 | 2 | 1 | 6 | 3 | 3 | 5 | 6 | 3 | 3 | 3 | 4 | 5 | 3 | Beijing |
| MTB165 | 4 | 2 | 4 | 1 | 6 | 3 | 2 | 5 | 5 | 3 | 3 | 3 | 4 | 5 | 4 | Beijing |
| MTB022 | 3 | 2 | 4 | 4 | 6 | 3 | 5 | 5 | 7 | 3 | 3 | 4 | 5 | 5 | 4 | Beijing |
| MTB024 | 4 | 2 | 4 | 4 | 6 | 3 | 5 | 5 | 7 | 3 | 2 | 3 | 5 | 5 | 5 | Beijing |
| MTB072 | 3 | 2 | 4 | 4 | 6 | 3 | 4 | 5 | 7 | 3 | 2 | 3 | 4 | 5 | 4 | Beijing |
| MTB017 | 4 | 2 | 4 | 3 | 6 | 3 | 5 | 5 | 7 | 3 | 2 | 4 | 5 | 5 | 3 | Beijing |
| MTB015 | 4 | 1 | 4 | 3 | 5 | 3 | 4 | 5 | 7 | 3 | 4 | 3 | 5 | 5 | 3 | Beijing |
| MTB013 | 4 | 2 | 4 | 3 | 5 | 3 | 4 | 5 | 7 | 3 | 3 | 3 | 4 | 5 | 3 | Beijing |
| MTB014 | 4 | 2 | 4 | 3 | 5 | 3 | 4 | 5 | 7 | 3 | 3 | 3 | 5 | 5 | 3 | Beijing |
| MTB026 | 5 | 2 | 4 | 3 | 5 | 3 | 4 | 5 | 7 | 3 | 3 | 3 | 5 | 5 | 4 | Beijing |
| MTB010 | 5 | 2 | 4 | 4 | 6 | 3 | 4 | 5 | 7 | 3 | 3 | 3 | 4 | 5 | 3 | Beijing |
| MTB011 | 4 | 1 | 4 | 3 | 6 | 3 | 4 | 5 | 7 | 3 | 3 | 3 | 4 | 5 | 3 | Beijing |
| MTB059 | 4 | 2 | 4 | 3 | 6 | 3 | 4 | 5 | 7 | 3 | 4 | 3 | 4 | 5 | 3 | Beijing |
| MTB023 | 4 | 2 | 4 | 4 | 6 | 3 | 5 | 5 | 7 | 3 | 3 | 3 | 5 | 5 | 4 | Beijing |
| MTB019 | 4 | 2 | 4 | 3 | 6 | 3 | 5 | 5 | 7 | 3 | 4 | 3 | 5 | 5 | 4 | Beijing |
| MTB020 | 4 | 2 | 4 | 3 | 6 | 3 | 5 | 5 | 7 | 3 | 3 | 3 | 5 | 5 | 5 | Beijing |
| MTB018 | 4 | 2 | 4 | 3 | 6 | 3 | 5 | 5 | 7 | 3 | 3 | 3 | 5 | 5 | 4 | Beijing |
| MTB222 | 4 | 2 | 4 | 3 | 6 | 3 | 5 | 5 | 7 | 3 | 3 | 3 | 5 | 5 | 4 | Beijing |
| MTB016 | 4 | 2 | 4 | 3 | 5 | 3 | 5 | 5 | 7 | 3 | 3 | 3 | 5 | 5 | 3 | Beijing |
| MTB221 | 4 | 2 | 4 | 3 | 5 | 3 | 5 | 5 | 8 | 3 | 3 | 3 | 5 | 5 | 4 | Beijing |
| MTB075 | 4 | 2 | 4 | 3 | 5 | 2 | 4 | 5 | 7 | 3 | 3 | 3 | 5 | 5 | 4 | Beijing |
| MTB205 | 4 | 2 | 4 | 3 | 5 | 2 | 4 | 5 | 6 | 3 | 3 | 3 | 5 | 5 | 4 | Beijing |
| MTB073 | 3 | 2 | 4 | 3 | 5 | 2 | 4 | 5 | 7 | 3 | 3 | 3 | 4 | 5 | 5 | Beijing |

*Mycobacterium tuberculosis* in Xuzhou

|        |   |   |   |   |   |   |   |   |   |   |   |   |   |   |   |              |
|--------|---|---|---|---|---|---|---|---|---|---|---|---|---|---|---|--------------|
| MTB102 | 4 | 2 | 4 | 3 | 6 | 2 | 4 | 5 | 7 | 3 | 3 | 4 | 4 | 5 | 4 | Beijing      |
| MTB182 | 4 | 2 | 4 | 3 | 6 | 2 | 4 | 5 | 6 | 3 | 4 | 3 | 4 | 5 | 4 | Beijing      |
| MTB031 | 5 | 2 | 4 | 3 | 6 | 3 | 4 | 5 | 8 | 4 | 3 | 4 | 6 | 4 | 4 | Beijing      |
| MTB039 | 4 | 1 | 4 | 3 | 5 | 3 | 4 | 5 | 7 | 4 | 3 | 3 | 6 | 4 | 5 | Beijing      |
| MTB080 | 4 | 2 | 4 | 3 | 5 | 3 | 4 | 5 | 7 | 3 | 4 | 2 | 5 | 4 | 4 | Beijing      |
| MTB271 | 3 | 2 | 4 | 3 | 5 | 3 | 4 | 6 | 7 | 3 | 3 | 2 | 5 | 4 | 4 | Beijing      |
| MTB291 | 4 | 2 | 4 | 3 | 6 | 3 | 5 | 5 | 8 | 4 | 4 | 2 | 6 | 4 | 4 | Beijing      |
| MTB306 | 4 | 2 | 4 | 3 | 6 | 2 | 4 | 5 | 8 | 4 | 4 | 2 | 6 | 4 | 4 | Beijing      |
| MTB021 | 6 | 2 | 4 | 4 | 6 | 3 | 5 | 5 | 7 | 3 | 4 | 3 | 5 | 5 | 4 | Beijing      |
| MTB032 | 6 | 1 | 4 | 4 | 6 | 3 | 4 | 5 | 7 | 4 | 4 | 3 | 6 | 4 | 4 | Beijing      |
| MTB071 | 6 | 2 | 4 | 3 | 6 | 3 | 4 | 5 | 7 | 3 | 3 | 4 | 4 | 5 | 4 | Beijing      |
| MTB129 | 5 | 2 | 4 | 3 | 6 | 3 | 4 | 5 | 6 | 3 | 3 | 4 | 4 | 5 | 4 | Beijing-like |
| MTB267 | 6 | 2 | 4 | 3 | 5 | 4 | 4 | 5 | 7 | 3 | 3 | 3 | 4 | 5 | 4 | Beijing-like |
| MTB270 | 4 | 2 | 4 | 3 | 5 | 1 | 4 | 6 | 8 | 3 | 3 | 2 | 5 | 4 | 4 | Beijing      |
| MTB003 | 4 | 2 | 4 | 3 | 5 | 3 | 3 | 6 | 7 | 3 | 3 | 4 | 5 | 4 | 2 | Beijing      |
| MTB136 | 4 | 2 | 4 | 3 | 5 | 3 | 2 | 5 | 6 | 3 | 4 | 3 | 5 | 4 | 2 | Beijing      |
| MTB065 | 4 | 2 | 4 | 3 | 5 | 3 | 3 | 5 | 6 | 3 | 3 | 3 | 4 | 5 | 2 | Beijing      |
| MTB124 | 4 | 2 | 4 | 3 | 5 | 3 | 2 | 5 | 7 | 3 | 3 | 3 | 4 | 5 | 2 | Beijing      |
| MTB178 | 4 | 2 | 4 | 3 | 6 | 2 | 2 | 5 | 6 | 3 | 3 | 3 | 4 | 5 | 2 | Beijing      |
| MTB051 | 5 | 2 | 4 | 3 | 6 | 3 | 2 | 5 | 5 | 3 | 3 | 4 | 4 | 5 | 4 | Beijing      |
| MTB215 | 4 | 2 | 4 | 3 | 6 | 3 | 2 | 5 | 5 | 3 | 2 | 3 | 4 | 5 | 3 | Beijing      |
| MTB055 | 3 | 2 | 4 | 3 | 5 | 3 | 2 | 5 | 6 | 3 | 3 | 4 | 4 | 5 | 3 | Beijing      |
| MTB216 | 3 | 2 | 4 | 3 | 6 | 4 | 2 | 5 | 5 | 3 | 3 | 3 | 4 | 5 | 3 | Beijing      |
| MTB056 | 3 | 2 | 4 | 3 | 5 | 3 | 3 | 5 | 7 | 3 | 3 | 3 | 4 | 5 | 3 | Beijing-like |
| MTB167 | 4 | 2 | 4 | 4 | 5 | 3 | 3 | 5 | 8 | 3 | 3 | 3 | 4 | 5 | 4 | Beijing      |
| MTB123 | 3 | 2 | 4 | 3 | 6 | 2 | 2 | 5 | 6 | 3 | 3 | 3 | 4 | 5 | 4 | Beijing      |
| MTB058 | 3 | 2 | 4 | 3 | 6 | 3 | 3 | 5 | 6 | 3 | 3 | 3 | 4 | 5 | 3 | Beijing      |
| MTB245 | 3 | 2 | 4 | 3 | 6 | 3 | 3 | 5 | 6 | 3 | 3 | 3 | 4 | 5 | 4 | Beijing      |
| MTB099 | 4 | 2 | 4 | 3 | 6 | 3 | 3 | 5 | 7 | 3 | 3 | 3 | 4 | 5 | 4 | Beijing      |
| MTB126 | 4 | 2 | 4 | 3 | 6 | 3 | 3 | 5 | 7 | 3 | 3 | 3 | 4 | 5 | 4 | Beijing      |
| MTB125 | 4 | 2 | 4 | 3 | 5 | 3 | 3 | 5 | 6 | 3 | 3 | 3 | 4 | 5 | 4 | Beijing      |
| MTB239 | 4 | 2 | 4 | 3 | 5 | 3 | 3 | 5 | 6 | 3 | 3 | 3 | 4 | 5 | 4 | Beijing      |
| MTB240 | 4 | 2 | 4 | 3 | 5 | 3 | 3 | 5 | 6 | 3 | 3 | 3 | 4 | 5 | 4 | Beijing      |
| MTB241 | 4 | 2 | 4 | 3 | 5 | 3 | 3 | 5 | 6 | 3 | 3 | 3 | 4 | 5 | 4 | Beijing      |
| MTB242 | 4 | 2 | 4 | 3 | 5 | 3 | 3 | 5 | 6 | 3 | 3 | 3 | 4 | 5 | 4 | Beijing      |
| MTB243 | 4 | 2 | 4 | 3 | 5 | 3 | 3 | 5 | 6 | 3 | 3 | 3 | 4 | 5 | 4 | Beijing      |
| MTB244 | 4 | 2 | 4 | 3 | 6 | 3 | 3 | 5 | 6 | 3 | 3 | 3 | 4 | 5 | 4 | Beijing      |

*Mycobacterium tuberculosis* in Xuzhou

|        |   |   |   |   |   |   |   |   |   |   |   |   |   |   |   |              |
|--------|---|---|---|---|---|---|---|---|---|---|---|---|---|---|---|--------------|
| MTB255 | 4 | 3 | 4 | 3 | 6 | 4 | 3 | 5 | 6 | 3 | 3 | 3 | 4 | 5 | 4 | Beijing      |
| MTB002 | 4 | 2 | 4 | 3 | 6 | 3 | 2 | 5 | 5 | 3 | 3 | 3 | 4 | 5 | 4 | Beijing      |
| MTB254 | 4 | 2 | 4 | 3 | 6 | 3 | 2 | 5 | 5 | 3 | 3 | 3 | 4 | 5 | 4 | Beijing      |
| MTB214 | 4 | 2 | 4 | 3 | 5 | 3 | 2 | 5 | 5 | 3 | 3 | 3 | 4 | 5 | 4 | Beijing      |
| MTB237 | 4 | 2 | 4 | 3 | 5 | 3 | 2 | 5 | 6 | 3 | 3 | 3 | 4 | 5 | 4 | Beijing      |
| MTB238 | 4 | 2 | 4 | 3 | 5 | 3 | 2 | 5 | 6 | 3 | 3 | 3 | 4 | 5 | 4 | Beijing      |
| MTB288 | 4 | 2 | 4 | 3 | 5 | 3 | 2 | 5 | 6 | 3 | 3 | 3 | 4 | 5 | 4 | Beijing-like |
| MTB289 | 3 | 2 | 4 | 3 | 5 | 3 | 2 | 5 | 6 | 3 | 3 | 3 | 4 | 5 | 4 | NEW          |
| MTB053 | 4 | 2 | 4 | 2 | 3 | 2 | 2 | 5 | 6 | 3 | 4 | 3 | 4 | 5 | 3 | Beijing      |
| MTB122 | 4 | 2 | 4 | 3 | 5 | 2 | 2 | 5 | 5 | 3 | 4 | 3 | 4 | 5 | 4 | Beijing      |
| MTB166 | 4 | 3 | 4 | 3 | 5 | 2 | 2 | 5 | 6 | 3 | 3 | 3 | 4 | 5 | 4 | Beijing      |
| MTB234 | 4 | 2 | 4 | 2 | 4 | 2 | 2 | 5 | 6 | 3 | 3 | 3 | 4 | 5 | 4 | Beijing      |
| MTB235 | 4 | 2 | 4 | 2 | 4 | 2 | 2 | 5 | 6 | 3 | 3 | 3 | 4 | 5 | 4 | Beijing      |
| MTB236 | 4 | 1 | 3 | 3 | 4 | 2 | 2 | 5 | 6 | 3 | 3 | 3 | 4 | 5 | 4 | Beijing      |
| MTB263 | 4 | 2 | 2 | 2 | 4 | 2 | 2 | 5 | 6 | 3 | 3 | 3 | 4 | 5 | 4 | Beijing      |
| MTB009 | 4 | 2 | 4 | 2 | 4 | 4 | 3 | 5 | 6 | 3 | 3 | 4 | 4 | 5 | 3 | Beijing      |
| MTB133 | 4 | 2 | 4 | 2 | 4 | 4 | 2 | 5 | 7 | 3 | 3 | 4 | 5 | 5 | 4 | Beijing      |
| MTB068 | 4 | 2 | 4 | 3 | 5 | 4 | 4 | 6 | 7 | 3 | 3 | 4 | 5 | 4 | 4 | Beijing      |
| MTB088 | 4 | 2 | 4 | 3 | 5 | 4 | 4 | 6 | 7 | 3 | 3 | 2 | 5 | 4 | 4 | Beijing      |
| MTB269 | 4 | 2 | 4 | 3 | 6 | 5 | 4 | 6 | 7 | 3 | 3 | 2 | 5 | 4 | 4 | Beijing      |
| MTB127 | 4 | 2 | 4 | 2 | 6 | 4 | 3 | 5 | 6 | 3 | 4 | 3 | 4 | 5 | 4 | Beijing      |
| MTB290 | 3 | 2 | 4 | 2 | 6 | 4 | 3 | 5 | 6 | 3 | 3 | 3 | 4 | 5 | 4 | Beijing      |
| MTB180 | 4 | 2 | 4 | 3 | 6 | 5 | 4 | 5 | 7 | 3 | 3 | 3 | 4 | 5 | 4 | Beijing      |
| MTB181 | 3 | 2 | 4 | 3 | 6 | 5 | 4 | 5 | 7 | 3 | 3 | 3 | 4 | 5 | 4 | Beijing      |
| MTB249 | 4 | 1 | 4 | 2 | 6 | 5 | 4 | 5 | 7 | 3 | 3 | 3 | 4 | 5 | 4 | Beijing      |
| MTB128 | 4 | 2 | 4 | 3 | 5 | 4 | 3 | 5 | 7 | 3 | 3 | 3 | 4 | 5 | 4 | Beijing      |
| MTB246 | 4 | 2 | 4 | 3 | 5 | 4 | 3 | 5 | 7 | 3 | 3 | 3 | 4 | 5 | 4 | Beijing      |
| MTB247 | 4 | 1 | 4 | 3 | 5 | 4 | 3 | 5 | 7 | 3 | 3 | 3 | 4 | 5 | 4 | Beijing      |
| MTB268 | 4 | 2 | 4 | 3 | 5 | 4 | 4 | 5 | 8 | 3 | 3 | 3 | 4 | 5 | 4 | Beijing      |
| MTB296 | 4 | 1 | 4 | 3 | 5 | 4 | 4 | 5 | 7 | 3 | 3 | 3 | 4 | 5 | 4 | Beijing      |
| MTB025 | 4 | 2 | 4 | 3 | 6 | 2 | 1 | 5 | 7 | 3 | 3 | 3 | 5 | 5 | 4 | Beijing      |
| MTB034 | 4 | 1 | 4 | 3 | 6 | 2 | 1 | 4 | 7 | 4 | 4 | 3 | 6 | 4 | 4 | Beijing      |
| MTB028 | 5 | 2 | 4 | 4 | 6 | 3 | 2 | 5 | 7 | 3 | 3 | 3 | 5 | 4 | 5 | Beijing      |
| MTB257 | 6 | 2 | 4 | 3 | 5 | 2 | 2 | 5 | 7 | 3 | 3 | 3 | 5 | 4 | 4 | Beijing      |
| MTB159 | 5 | 2 | 4 | 3 | 6 | 3 | 2 | 5 | 5 | 3 | 3 | 3 | 6 | 4 | 4 | Beijing      |
| MTB161 | 6 | 2 | 4 | 3 | 6 | 2 | 2 | 5 | 6 | 3 | 4 | 4 | 7 | 4 | 4 | Beijing      |

*Mycobacterium tuberculosis* in Xuzhou

|        |   |   |   |   |   |   |   |   |   |   |   |   |   |   |   |         |
|--------|---|---|---|---|---|---|---|---|---|---|---|---|---|---|---|---------|
| MTB272 | 4 | 1 | 3 | 3 | 6 | 2 | 2 | 7 | 7 | 3 | 4 | 2 | 5 | 4 | 4 | Beijing |
| MTB094 | 4 | 2 | 4 | 3 | 5 | 2 | 2 | 5 | 6 | 3 | 3 | 2 | 5 | 4 | 5 | Beijing |
| MTB081 | 3 | 2 | 4 | 3 | 5 | 2 | 2 | 5 | 7 | 3 | 4 | 2 | 5 | 4 | 5 | Beijing |
| MTB093 | 4 | 2 | 4 | 3 | 5 | 2 | 2 | 5 | 7 | 3 | 4 | 2 | 5 | 4 | 4 | Beijing |
| MTB273 | 4 | 2 | 4 | 3 | 5 | 3 | 2 | 5 | 7 | 3 | 4 | 2 | 5 | 4 | 4 | Beijing |
| MTB105 | 3 | 2 | 4 | 3 | 6 | 3 | 2 | 5 | 7 | 3 | 4 | 2 | 5 | 4 | 5 | Beijing |
| MTB224 | 2 | 2 | 4 | 3 | 6 | 3 | 2 | 5 | 7 | 3 | 4 | 2 | 5 | 4 | 4 | Beijing |
| MTB148 | 4 | 2 | 4 | 3 | 6 | 2 | 2 | 5 | 8 | 4 | 3 | 2 | 6 | 4 | 4 | Beijing |
| MTB067 | 5 | 2 | 4 | 3 | 6 | 3 | 2 | 5 | 8 | 4 | 4 | 2 | 6 | 4 | 4 | Beijing |
| MTB274 | 5 | 2 | 4 | 4 | 6 | 3 | 2 | 5 | 8 | 4 | 3 | 2 | 6 | 4 | 4 | Beijing |
| MTB040 | 4 | 2 | 4 | 3 | 5 | 3 | 2 | 5 | 6 | 4 | 4 | 3 | 6 | 4 | 4 | Beijing |
| MTB157 | 3 | 2 | 4 | 3 | 5 | 3 | 2 | 5 | 5 | 4 | 4 | 2 | 6 | 4 | 4 | Beijing |
| MTB191 | 4 | 2 | 4 | 3 | 5 | 4 | 2 | 5 | 7 | 4 | 4 | 3 | 7 | 4 | 5 | Beijing |
| MTB318 | 4 | 2 | 4 | 3 | 5 | 4 | 2 | 5 | 7 | 3 | 4 | 2 | 6 | 4 | 5 | Beijing |
| MTB078 | 4 | 2 | 3 | 3 | 4 | 3 | 2 | 6 | 7 | 3 | 4 | 3 | 5 | 4 | 4 | Beijing |
| MTB027 | 4 | 2 | 4 | 3 | 5 | 3 | 2 | 5 | 7 | 3 | 3 | 4 | 5 | 4 | 4 | Beijing |
| MTB137 | 3 | 2 | 4 | 3 | 5 | 3 | 2 | 5 | 7 | 3 | 3 | 4 | 5 | 4 | 4 | Beijing |
| MTB135 | 4 | 2 | 4 | 3 | 5 | 3 | 2 | 5 | 7 | 3 | 3 | 3 | 5 | 5 | 4 | Beijing |
| MTB134 | 3 | 2 | 4 | 3 | 5 | 3 | 2 | 5 | 7 | 3 | 3 | 3 | 5 | 5 | 4 | Beijing |
| MTB139 | 3 | 2 | 4 | 3 | 5 | 3 | 2 | 5 | 7 | 3 | 3 | 3 | 5 | 4 | 4 | Beijing |
| MTB079 | 4 | 2 | 4 | 3 | 5 | 3 | 2 | 6 | 7 | 3 | 3 | 3 | 5 | 4 | 4 | Beijing |
| MTB138 | 4 | 2 | 4 | 3 | 5 | 3 | 2 | 5 | 7 | 3 | 3 | 3 | 5 | 4 | 4 | Beijing |
| MTB218 | 4 | 2 | 4 | 3 | 5 | 3 | 2 | 6 | 6 | 3 | 3 | 3 | 5 | 4 | 4 | Beijing |
| MTB076 | 4 | 2 | 4 | 3 | 5 | 2 | 2 | 6 | 7 | 3 | 3 | 4 | 5 | 4 | 4 | Beijing |
| MTB029 | 4 | 1 | 4 | 3 | 5 | 2 | 2 | 5 | 7 | 3 | 3 | 3 | 5 | 4 | 4 | Beijing |
| MTB223 | 4 | 2 | 4 | 3 | 5 | 2 | 2 | 5 | 8 | 3 | 3 | 3 | 5 | 4 | 4 | Beijing |
| MTB298 | 4 | 2 | 4 | 3 | 5 | 2 | 2 | 5 | 7 | 3 | 3 | 3 | 5 | 4 | 4 | Beijing |
| MTB104 | 4 | 2 | 4 | 2 | 5 | 3 | 3 | 6 | 7 | 3 | 3 | 3 | 5 | 4 | 4 | Beijing |
| MTB083 | 3 | 2 | 4 | 3 | 5 | 3 | 3 | 6 | 7 | 3 | 3 | 3 | 5 | 4 | 4 | Beijing |
| MTB219 | 4 | 2 | 4 | 3 | 5 | 3 | 3 | 6 | 7 | 3 | 3 | 3 | 5 | 4 | 4 | Beijing |
| MTB228 | 4 | 2 | 4 | 3 | 5 | 3 | 3 | 6 | 8 | 4 | 3 | 3 | 6 | 4 | 4 | Beijing |
| MTB141 | 3 | 2 | 4 | 2 | 4 | 4 | 2 | 5 | 6 | 3 | 3 | 3 | 5 | 4 | 4 | Beijing |
| MTB103 | 3 | 2 | 4 | 3 | 5 | 4 | 2 | 5 | 7 | 3 | 4 | 3 | 5 | 5 | 4 | Beijing |
| MTB143 | 3 | 2 | 4 | 3 | 5 | 4 | 2 | 5 | 7 | 3 | 4 | 3 | 5 | 4 | 4 | Beijing |
| MTB145 | 3 | 2 | 4 | 3 | 5 | 4 | 2 | 5 | 7 | 3 | 3 | 3 | 5 | 4 | 4 | Beijing |
| MTB183 | 3 | 2 | 4 | 3 | 5 | 4 | 2 | 5 | 7 | 3 | 3 | 3 | 5 | 4 | 4 | Beijing |

*Mycobacterium tuberculosis* in Xuzhou

|        |   |   |   |   |   |   |   |   |   |   |   |   |   |   |   |         |
|--------|---|---|---|---|---|---|---|---|---|---|---|---|---|---|---|---------|
| MTB188 | 3 | 2 | 4 | 3 | 5 | 4 | 2 | 5 | 7 | 3 | 3 | 3 | 5 | 4 | 4 | Beijing |
| MTB186 | 3 | 2 | 4 | 3 | 5 | 4 | 2 | 5 | 6 | 3 | 3 | 3 | 5 | 4 | 4 | Beijing |
| MTB140 | 4 | 2 | 4 | 3 | 6 | 4 | 2 | 5 | 7 | 3 | 3 | 3 | 5 | 4 | 5 | Beijing |
| MTB144 | 4 | 2 | 4 | 3 | 5 | 4 | 2 | 5 | 8 | 3 | 3 | 3 | 5 | 4 | 4 | Beijing |
| MTB187 | 4 | 2 | 4 | 3 | 5 | 4 | 2 | 5 | 7 | 3 | 3 | 3 | 5 | 4 | 4 | Beijing |
| MTB185 | 4 | 2 | 4 | 3 | 5 | 4 | 2 | 5 | 7 | 3 | 2 | 3 | 5 | 4 | 4 | Beijing |
| MTB264 | 4 | 2 | 4 | 2 | 5 | 4 | 2 | 5 | 7 | 3 | 3 | 3 | 5 | 4 | 4 | Beijing |
| MTB265 | 4 | 2 | 4 | 2 | 5 | 4 | 2 | 5 | 8 | 3 | 3 | 3 | 5 | 4 | 4 | Beijing |
| MTB090 | 3 | 2 | 4 | 3 | 5 | 3 | 3 | 4 | 7 | 3 | 4 | 3 | 5 | 4 | 4 | Beijing |
| MTB037 | 3 | 2 | 4 | 3 | 5 | 3 | 3 | 5 | 8 | 4 | 4 | 4 | 6 | 4 | 4 | Beijing |
| MTB312 | 4 | 2 | 4 | 3 | 5 | 3 | 3 | 6 | 8 | 4 | 4 | 4 | 6 | 4 | 5 | Beijing |
| MTB227 | 3 | 2 | 4 | 3 | 5 | 3 | 2 | 5 | 7 | 4 | 4 | 4 | 6 | 4 | 4 | Beijing |
| MTB315 | 3 | 2 | 4 | 2 | 6 | 3 | 3 | 5 | 8 | 4 | 4 | 4 | 6 | 4 | 5 | Beijing |
| MTB035 | 4 | 2 | 4 | 3 | 6 | 4 | 2 | 5 | 8 | 4 | 3 | 4 | 6 | 4 | 4 | Beijing |
| MTB225 | 4 | 2 | 4 | 3 | 6 | 3 | 2 | 5 | 7 | 4 | 3 | 4 | 6 | 4 | 4 | Beijing |
| MTB276 | 4 | 2 | 4 | 2 | 6 | 4 | 2 | 5 | 8 | 4 | 4 | 4 | 6 | 4 | 4 | Beijing |
| MTB066 | 4 | 2 | 4 | 3 | 5 | 3 | 2 | 5 | 9 | 4 | 4 | 4 | 6 | 4 | 4 | Beijing |
| MTB307 | 4 | 2 | 4 | 3 | 5 | 3 | 2 | 5 | 8 | 4 | 4 | 4 | 6 | 4 | 4 | Beijing |
| MTB292 | 4 | 2 | 4 | 3 | 6 | 3 | 2 | 5 | 8 | 4 | 4 | 4 | 6 | 4 | 4 | Beijing |
| MTB259 | 4 | 2 | 4 | 3 | 5 | 4 | 2 | 5 | 8 | 4 | 4 | 3 | 6 | 4 | 4 | Beijing |
| MTB319 | 4 | 2 | 4 | 3 | 5 | 4 | 2 | 5 | 8 | 4 | 4 | 4 | 6 | 4 | 4 | Beijing |
| MTB320 | 4 | 2 | 4 | 3 | 5 | 4 | 2 | 5 | 9 | 4 | 4 | 4 | 6 | 4 | 5 | Beijing |
| MTB202 | 4 | 2 | 4 | 3 | 5 | 4 | 2 | 5 | 7 | 3 | 4 | 3 | 5 | 4 | 6 | Beijing |
| MTB324 | 3 | 2 | 4 | 3 | 5 | 3 | 2 | 6 | 7 | 3 | 3 | 3 | 5 | 4 | 6 | Beijing |
| MTB036 | 4 | 1 | 4 | 2 | 6 | 4 | 3 | 5 | 7 | 4 | 4 | 3 | 6 | 4 | 5 | Beijing |
| MTB293 | 6 | 1 | 4 | 2 | 6 | 4 | 3 | 6 | 8 | 4 | 3 | 3 | 6 | 4 | 4 | Beijing |
| MTB275 | 4 | 2 | 4 | 1 | 6 | 3 | 2 | 5 | 8 | 4 | 4 | 2 | 6 | 4 | 4 | Beijing |
| MTB084 | 3 | 2 | 4 | 3 | 5 | 3 | 3 | 6 | 7 | 3 | 4 | 1 | 5 | 4 | 4 | Beijing |
| MTB085 | 4 | 2 | 4 | 3 | 5 | 3 | 3 | 6 | 7 | 3 | 3 | 1 | 5 | 4 | 4 | Beijing |
| MTB086 | 4 | 2 | 4 | 3 | 5 | 3 | 3 | 6 | 7 | 3 | 3 | 1 | 5 | 4 | 4 | Beijing |
| MTB087 | 4 | 2 | 4 | 3 | 5 | 4 | 3 | 6 | 7 | 3 | 3 | 1 | 5 | 4 | 4 | Beijing |
| MTB089 | 4 | 2 | 4 | 3 | 5 | 3 | 3 | 6 | 7 | 3 | 3 | 2 | 5 | 4 | 5 | Beijing |
| MTB325 | 4 | 2 | 4 | 2 | 6 | 3 | 3 | 6 | 7 | 3 | 4 | 2 | 5 | 4 | 6 | Beijing |
| MTB038 | 3 | 2 | 4 | 3 | 5 | 3 | 3 | 5 | 9 | 4 | 4 | 2 | 6 | 4 | 4 | Beijing |
| MTB098 | 3 | 2 | 4 | 3 | 6 | 3 | 3 | 5 | 8 | 4 | 4 | 2 | 6 | 4 | 4 | Beijing |
| MTB108 | 4 | 2 | 4 | 3 | 6 | 3 | 3 | 5 | 8 | 4 | 4 | 2 | 6 | 4 | 4 | Beijing |
| MTB226 | 4 | 2 | 4 | 2 | 6 | 4 | 3 | 5 | 8 | 4 | 4 | 2 | 6 | 4 | 4 | Beijing |

*Mycobacterium tuberculosis* in Xuzhou

|        |   |   |   |   |   |   |   |   |   |   |   |   |   |   |   |         |
|--------|---|---|---|---|---|---|---|---|---|---|---|---|---|---|---|---------|
| MTB304 | 4 | 1 | 3 | 2 | 5 | 3 | 3 | 5 | 8 | 4 | 4 | 2 | 6 | 4 | 5 | Beijing |
| MTB309 | 4 | 1 | 4 | 3 | 5 | 3 | 3 | 5 | 9 | 4 | 4 | 2 | 6 | 4 | 5 | Beijing |
| MTB229 | 2 | 1 | 4 | 3 | 5 | 3 | 4 | 6 | 8 | 4 | 4 | 2 | 6 | 4 | 4 | Beijing |
| MTB305 | 3 | 2 | 4 | 3 | 5 | 4 | 4 | 5 | 8 | 4 | 4 | 2 | 6 | 4 | 5 | Beijing |
| MTB311 | 2 | 2 | 4 | 3 | 5 | 3 | 3 | 6 | 8 | 4 | 3 | 2 | 6 | 4 | 4 | Beijing |
| MTB313 | 2 | 2 | 4 | 3 | 6 | 4 | 3 | 6 | 9 | 4 | 4 | 3 | 6 | 4 | 4 | Beijing |
| MTB097 | 2 | 2 | 4 | 4 | 5 | 3 | 2 | 5 | 8 | 4 | 3 | 2 | 5 | 4 | 5 | Beijing |
| MTB303 | 3 | 1 | 4 | 3 | 5 | 3 | 2 | 5 | 9 | 4 | 3 | 2 | 6 | 4 | 5 | Beijing |
| MTB150 | 2 | 2 | 4 | 2 | 6 | 4 | 2 | 5 | 7 | 2 | 4 | 4 | 6 | 4 | 4 | Beijing |
| MTB295 | 2 | 2 | 4 | 2 | 6 | 4 | 2 | 5 | 8 | 4 | 4 | 4 | 6 | 4 | 4 | Beijing |
| MTB308 | 3 | 2 | 6 | 2 | 4 | 4 | 2 | 5 | 8 | 4 | 4 | 4 | 6 | 4 | 4 | Beijing |
| MTB316 | 3 | 2 | 4 | 2 | 4 | 4 | 2 | 5 | 9 | 4 | 4 | 4 | 6 | 4 | 4 | Beijing |
| MTB054 | 2 | 2 | 4 | 1 | 3 | 2 | 2 | 5 | 7 | 3 | 3 | 3 | 4 | 5 | 3 | Beijing |
| MTB153 | 3 | 1 | 4 | 2 | 4 | 2 | 2 | 5 | 7 | 3 | 3 | 3 | 4 | 5 | 4 | Beijing |
| MTB179 | 3 | 2 | 4 | 2 | 3 | 2 | 2 | 5 | 7 | 3 | 4 | 3 | 4 | 5 | 4 | Beijing |
| MTB151 | 3 | 2 | 4 | 3 | 3 | 2 | 2 | 5 | 7 | 3 | 4 | 2 | 7 | 4 | 5 | Beijing |
| MTB041 | 4 | 2 | 4 | 3 | 3 | 2 | 1 | 5 | 7 | 4 | 4 | 4 | 6 | 4 | 4 | T1      |
| MTB092 | 4 | 2 | 4 | 2 | 4 | 1 | 2 | 5 | 7 | 3 | 4 | 2 | 5 | 4 | 5 | T1      |
| MTB096 | 4 | 1 | 4 | 2 | 4 | 2 | 2 | 5 | 7 | 3 | 4 | 2 | 5 | 4 | 4 | T1      |
| MTB147 | 3 | 2 | 4 | 3 | 5 | 1 | 2 | 5 | 8 | 4 | 4 | 2 | 6 | 4 | 4 | T1      |
| MTB155 | 3 | 2 | 4 | 2 | 4 | 1 | 2 | 5 | 8 | 4 | 4 | 3 | 6 | 4 | 4 | T1      |
| MTB230 | 3 | 1 | 4 | 3 | 5 | 2 | 2 | 5 | 8 | 4 | 4 | 3 | 6 | 4 | 4 | H3      |
| MTB107 | 3 | 2 | 4 | 2 | 4 | 2 | 2 | 5 | 7 | 4 | 3 | 2 | 6 | 4 | 4 | T2      |
| MTB220 | 3 | 2 | 4 | 2 | 4 | 2 | 2 | 5 | 8 | 4 | 4 | 2 | 6 | 4 | 4 | T1      |
| MTB278 | 4 | 2 | 4 | 2 | 4 | 2 | 2 | 5 | 8 | 4 | 4 | 2 | 6 | 4 | 4 | T1      |
| MTB294 | 4 | 2 | 4 | 2 | 3 | 2 | 2 | 5 | 8 | 4 | 4 | 2 | 6 | 4 | 4 | T1      |
| MTB156 | 4 | 2 | 4 | 3 | 5 | 2 | 2 | 5 | 9 | 4 | 3 | 4 | 6 | 4 | 4 | T1      |
| MTB033 | 4 | 2 | 4 | 2 | 4 | 2 | 2 | 6 | 8 | 4 | 4 | 4 | 6 | 4 | 5 | T1      |
| MTB106 | 4 | 2 | 4 | 2 | 4 | 2 | 2 | 5 | 8 | 4 | 4 | 4 | 5 | 4 | 4 | T1      |
| MTB300 | 4 | 2 | 4 | 2 | 4 | 2 | 2 | 5 | 8 | 4 | 4 | 4 | 6 | 4 | 4 | T1-T2   |
| MTB310 | 4 | 2 | 4 | 2 | 4 | 1 | 2 | 5 | 8 | 4 | 4 | 4 | 6 | 4 | 5 | T1      |
| MTB131 | 4 | 2 | 4 | 2 | 3 | 2 | 2 | 5 | 7 | 3 | 3 | 3 | 5 | 5 | 5 | T1      |
| MTB077 | 4 | 2 | 4 | 2 | 4 | 2 | 2 | 6 | 7 | 3 | 3 | 3 | 5 | 4 | 4 | T1      |
| MTB217 | 4 | 2 | 4 | 2 | 4 | 2 | 2 | 5 | 7 | 3 | 3 | 3 | 5 | 4 | 4 | T1      |
| MTB297 | 4 | 2 | 4 | 2 | 4 | 2 | 2 | 5 | 7 | 3 | 3 | 3 | 5 | 4 | 4 | T2      |
| MTB256 | 3 | 2 | 4 | 2 | 3 | 2 | 2 | 5 | 7 | 3 | 3 | 3 | 5 | 4 | 4 | NEW     |



*Mycobacterium tuberculosis* in Xuzhou

|        |   |   |   |   |   |   |   |   |   |   |   |   |   |   |   |         |
|--------|---|---|---|---|---|---|---|---|---|---|---|---|---|---|---|---------|
| MTB190 | 4 | 2 | 4 | 2 | 4 | 2 | 2 | 5 | 8 | 3 | 3 | 4 | 7 | 4 | 4 | NEW     |
| MTB322 | 4 | 2 | 4 | 2 | 4 | 2 | 2 | 5 | 8 | 2 | 4 | 4 | 6 | 4 | 5 | T2      |
| MTB314 | 6 | 2 | 4 | 2 | 4 | 2 | 2 | 5 | 8 | 4 | 4 | 4 | 6 | 4 | 5 | T2      |
| MTB258 | 4 | 2 | 2 | 2 | 4 | 2 | 2 | 5 | 8 | 4 | 4 | 2 | 6 | 4 | 4 | T2      |
| MTB299 | 3 | 2 | 2 | 2 | 4 | 2 | 2 | 5 | 8 | 4 | 4 | 2 | 6 | 4 | 5 | NEW     |
| MTB301 | 3 | 2 | 2 | 2 | 4 | 2 | 2 | 5 | 9 | 4 | 4 | 2 | 6 | 4 | 5 | T2      |
| MTB109 | 2 | 2 | 4 | 4 | 5 | 2 | 2 | 5 | 4 | 2 | 4 | 3 | 6 | 4 | 4 | T2      |
| MTB231 | 2 | 2 | 4 | 5 | 5 | 2 | 2 | 5 | 6 | 2 | 3 | 4 | 6 | 4 | 4 | T2      |
| MTB110 | 4 | 2 | 4 | 2 | 4 | 2 | 2 | 5 | 5 | 2 | 4 | 4 | 6 | 4 | 4 | T2      |
| MTB149 | 4 | 1 | 4 | 2 | 4 | 2 | 2 | 5 | 6 | 2 | 4 | 3 | 6 | 4 | 4 | T2      |
| MTB317 | 4 | 2 | 2 | 2 | 4 | 2 | 2 | 5 | 6 | 3 | 4 | 4 | 6 | 4 | 5 | T2      |
| MTB192 | 4 | 2 | 4 | 2 | 6 | 2 | 2 | 5 | 7 | 2 | 2 | 5 | 7 | 4 | 4 | T1-T2   |
| MTB193 | 3 | 2 | 4 | 2 | 6 | 2 | 2 | 5 | 6 | 3 | 3 | 5 | 7 | 4 | 5 | T5      |
| MTB194 | 4 | 2 | 4 | 2 | 5 | 3 | 2 | 5 | 7 | 3 | 3 | 5 | 8 | 4 | 4 | U       |
| MTB195 | 4 | 2 | 4 | 2 | 4 | 2 | 2 | 5 | 7 | 3 | 3 | 5 | 8 | 4 | 4 | U       |
| MTB250 | 4 | 2 | 4 | 2 | 4 | 2 | 2 | 5 | 6 | 3 | 3 | 5 | 7 | 4 | 4 | U       |
| MTB197 | 4 | 2 | 2 | 3 | 5 | 3 | 3 | 5 | 7 | 2 | 4 | 5 | 8 | 4 | 4 | H3      |
| MTB196 | 3 | 2 | 4 | 3 | 5 | 3 | 3 | 5 | 6 | 3 | 4 | 5 | 8 | 4 | 5 | H3      |
| MTB281 | 4 | 2 | 4 | 3 | 5 | 3 | 2 | 5 | 6 | 3 | 4 | 4 | 7 | 4 | 4 | MANU2   |
| MTB233 | 2 | 2 | 4 | 2 | 3 | 2 | 2 | 5 | 5 | 3 | 4 | 4 | 7 | 4 | 4 | MANU2   |
| MTB198 | 2 | 2 | 3 | 2 | 4 | 2 | 1 | 5 | 7 | 2 | 4 | 5 | 8 | 4 | 6 | NEW     |
| MTB189 | 1 | 1 | 3 | 2 | 4 | 2 | 2 | 3 | 8 | 3 | 4 | 3 | 7 | 4 | 5 | NEW     |
| MTB160 | 2 | 2 | 4 | 3 | 6 | 1 | 2 | 4 | 8 | 3 | 4 | 4 | 7 | 4 | 5 | NEW     |
| MTB232 | 2 | 2 | 4 | 2 | 4 | 2 | 2 | 5 | 9 | 3 | 4 | 3 | 7 | 4 | 4 | NEW     |
| MTB323 | 2 | 1 | 4 | 2 | 4 | 2 | 2 | 5 | 8 | 3 | 4 | 4 | 7 | 4 | 4 | NEW     |
| MTB302 | 2 | 2 | 4 | 2 | 4 | 2 | 2 | 5 | 8 | 4 | 4 | 4 | 6 | 4 | 4 | NEW     |
| MTB282 | 2 | 2 | 4 | 3 | 4 | 3 | 2 | 5 | 7 | 3 | 4 | 4 | 7 | 4 | 4 | NEW     |
| MTB280 | 2 | 2 | 4 | 2 | 4 | 2 | 2 | 5 | 7 | 2 | 3 | 3 | 6 | 4 | 4 | Beijing |
| MTB321 | 2 | 2 | 4 | 2 | 4 | 2 | 2 | 5 | 7 | 2 | 4 | 4 | 6 | 4 | 4 | Beijing |
| MTB279 | 2 | 1 | 3 | 3 | 5 | 1 | 4 | 5 | 8 | 1 | 4 | 4 | 6 | 4 | 4 | NEW     |
| MTB283 | 3 | 1 | 4 | 3 | 5 | 3 | 4 | 5 | 8 | 2 | 1 | 5 | 7 | 4 | 4 | NEW     |
| MTB116 | 4 | 2 | 4 | 3 | 5 | 4 | 3 | 5 | 1 | 3 | 3 | 4 | 3 | 2 | 4 | NEW     |
| MTB199 | 4 | 2 | 4 | 3 | 5 | 3 | 4 | 5 | 3 | 3 | 3 | 3 | 1 | 2 | 2 | NEW     |
| MTB206 | 6 | 2 | 4 | 4 | 6 | 4 | 4 | 4 | 2 | 3 | 3 | 3 | 3 | 2 | 2 | NEW     |
| MTB210 | 2 | 2 | 3 | 1 | 5 | 2 | 2 | 4 | 2 | 1 | 2 | 3 | 2 | 2 | 6 | NEW     |
